# Supplementary material for: Predicting return to work among patients with colorectal cancer
Source: PubMed Central journal article supplement — Br J Surg. 2019 Oct 25;107(1):140–8. doi: 10.1002/bjs.11313 (PMC6973054; doi:10.1002/bjs.11313), 2019-10-25
Supplement: BJS-107-140-s001.pdf [file BJS-107-140-s001.pdf]

Mister Peter V., 50 years old presents himself with colorectal cancer with metastases. His operation went uncomplicated, he got a stoma and he will receive adjuvant therapy. He has developed emotional distress.

| <b>Return to work at 1 year score</b> |              |                                         |
|---------------------------------------|--------------|-----------------------------------------|
| <b>Variable</b>                       | <b>Value</b> | <b>Points (95% confidence interval)</b> |
| Presence of metastases                | No           | 0                                       |
|                                       | Yes          | <b>-0.84 (-1.61 – -0.06) *1</b>         |
| Adjuvant therapy                      | No           | 0                                       |
|                                       | Yes          | <b>-1.56 (-2.21 – -0.94) *1</b>         |
| Stoma                                 | No           | 0                                       |
|                                       | Yes          | <b>-1.30 (-1.90 – -0.71) *1</b>         |
| Emotional distress                    | No           | 0                                       |
|                                       | Yes          | <b>-0.75 (-1.35 – -0.15) *1</b>         |
| Postoperative complications           | No           | <b>0*1</b>                              |
|                                       | Yes          | -0.52 (-1.08 – 0.06)                    |
|                                       |              | <b>1.16</b>                             |
| <b>Total</b>                          |              | <b>-3.29 (-5.91 – -0.70)</b>            |

$$\text{Predicted chance for return to work at 1 year} = \frac{1}{1 + e^{-(-3.29)}} = 0.036 = 3.6\% \text{ (95\%CI 0.27\% – 33.2\%)}$$

Miss Laura B., 56 years old presents herself with colorectal cancer without metastases. Her operation went uncomplicated. She doesn't developed emotional distress. She works in a medium-sized company with 100 employees. Her occupational health physician advices her a constructive trajectory to return to work.

| <b>Return to work at 2 years score</b>   |              |                                         |
|------------------------------------------|--------------|-----------------------------------------|
| <b>Variable</b>                          | <b>Value</b> | <b>Points (95% confidence interval)</b> |
| Presence of metastases                   | No           | <b>0</b>                                |
|                                          | Yes          | -0.95 (-1.56 – -0.33)                   |
| Emotional distress                       | No           | <b>0</b>                                |
|                                          | Yes          | -0.95 (-1.51 – -0.40)                   |
| Postoperative complications              | No           | <b>0</b>                                |
|                                          | Yes          | -0.60 (-1.14 – -0.07)                   |
| Company size                             | <10          | 0                                       |
|                                          | <50          | -0.28 (-0.89 – 0.32)                    |
|                                          | <250         | <b>-0.60 (-1.39 – 0.17) *1</b>          |
|                                          | >251         | -1.31 (-2.66 – 0.11)                    |
| Trajectory of the return to work process | Directly     | 0                                       |
|                                          | Constructive | <b>1.26 (0.73 – 1.72) *1</b>            |
|                                          |              | <b>1.08</b>                             |
| <b>Total</b>                             |              | <b>1.74 (0.42 – 2.97)</b>               |

$$\text{Predicted chance for return to work at 2 years} = \frac{1}{1 + e^{-(1.74)}} = 0.85 = 85\% \text{ (95\%CI 60\% – 95\%)}$$

Figure 4; Two cases of fictitious patients using the 1- and 2-years return to work prediction models
